# Supplementary material
Source: PubMed Central journal article supplement (PMC4760916)
Supplement: NIHMS728064-supplement-Supp_MaterialS1.pdf [file NIHMS728064-supplement-Supp_MaterialS1.pdf]

# Web-based Supplementary Materials for “Movement Prediction Using Accelerometers in a Human Population”

by

Luo Xiao, Bing He, Annemarie Koster, Paolo Caserotti, Brittney Lange-Maia, Nancy W. Glynn, Tamara B. Harris and Ciprian M. Crainiceanu

## A Additional Figures

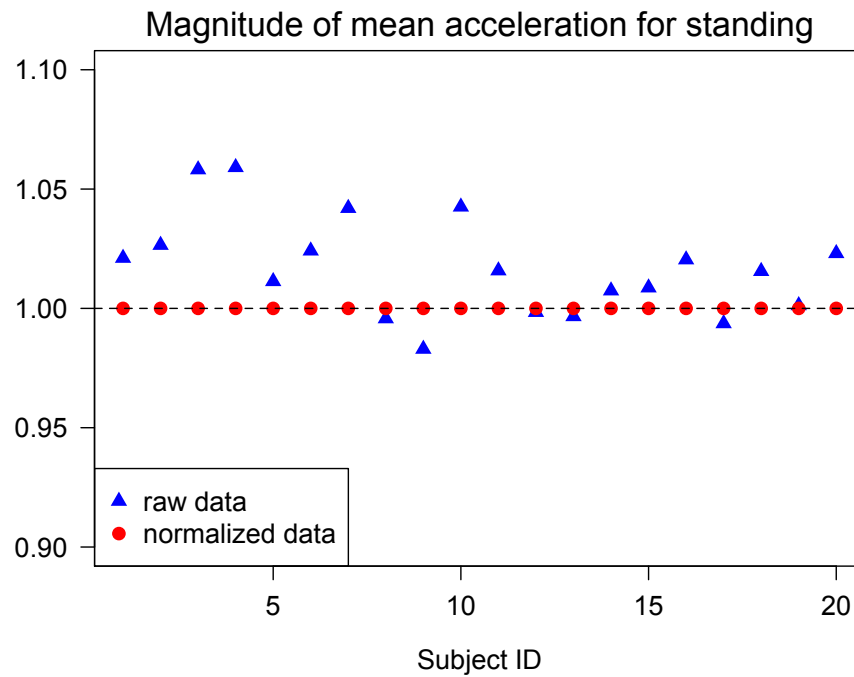

Figure Web-1: Magnitude of the mean acceleration vector during standing (expressed in  $g$  units) using the raw and normalized data. Blue triangles are for raw data while red circles are for normalized data.

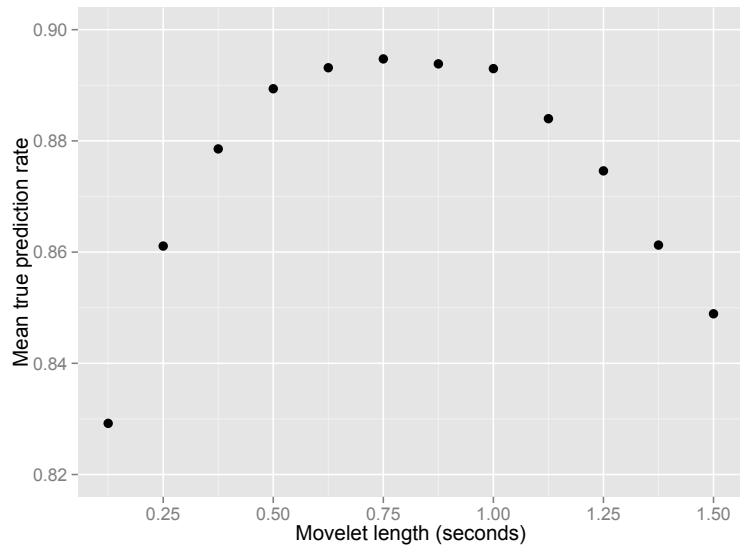

Figure Web-2: Cross-validated mean true prediction rate using different movelet lengths for the training data.

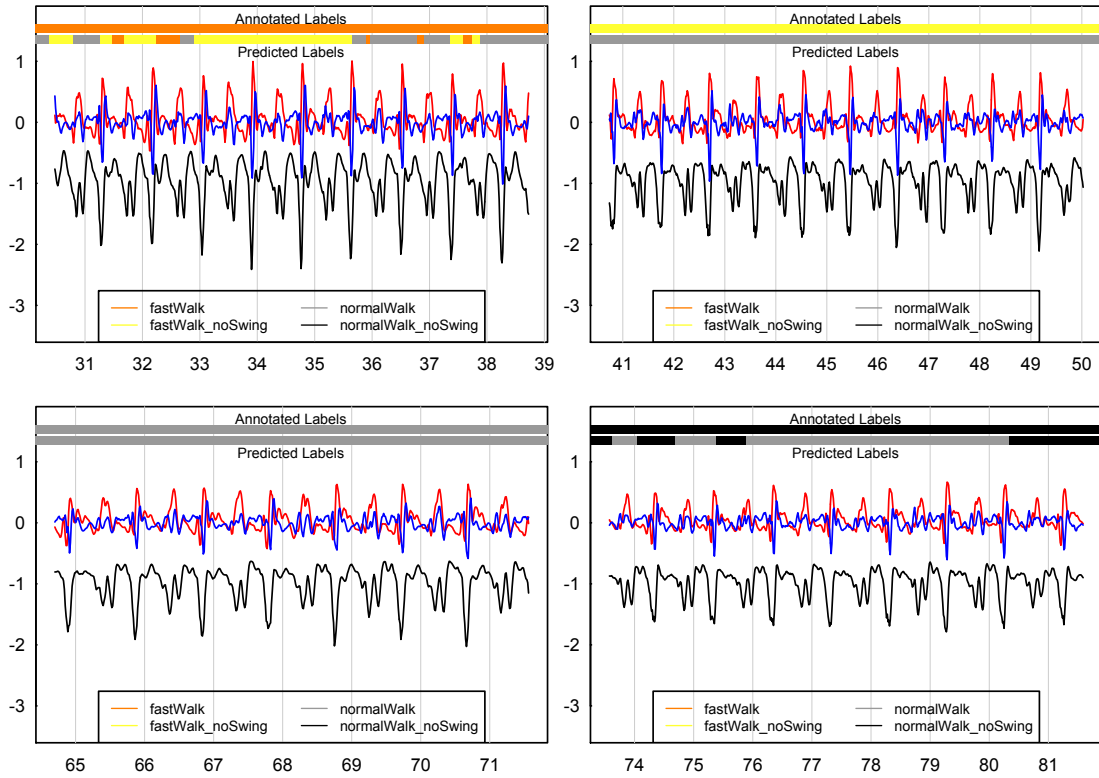

Figure Web-3: Prediction results of one subject's four types of walking. The top panels display data for normalWalk (left column) and normalWalk\_noSwing (right column), the bottom panels display data for fastWalk (left column) and fastWalking\_noSwing (right column). The activity types can also be distinguished by the annotated labels in each plot. For the accelerometry data, the black lines are for the up-down axis, the red lines are for the forward-backward axis, and the blue lines are for the left-right axis.

## B A Test for Systematic Bias

Let  $\mathbf{X} \in \mathbb{R}^3$  be the acceleration vector at an observation point when the subject is standing still. Suppose that  $\mathbf{X}$  follows a multivariate normal distribution with mean  $\boldsymbol{\mu}$  and covariance  $\boldsymbol{\Sigma}$ . Let  $\mathbf{X}_1, \dots, \mathbf{X}_n$  be i.i.d. copies of  $\mathbf{X}$ . Then  $\bar{\mathbf{X}} = n^{-1} \sum_{i=1}^n \mathbf{X}_i$  is normal with mean  $\boldsymbol{\mu}$  and covariance  $\boldsymbol{\Sigma}/n$ . Testing if there is systematic bias in the observations is to testing  $\|\boldsymbol{\mu}\| = 1$  where  $\|\cdot\|$  denotes the Euclidean norm. We consider the testing statistic  $\|\bar{\mathbf{X}}\|^2$ , which has mean  $\|\boldsymbol{\mu}\|^2 + \text{tr}(\boldsymbol{\Sigma})/n$  and variance  $\text{var}(\|\bar{\mathbf{X}}\|^2)$ . Here  $\text{tr}(\cdot)$  denotes the trace of a square matrix, i.e., the sum of the diagonal entries. The derivation of the variance term is more involved. We let  $\mathbf{ODO}^T$  be the eigendecomposition of  $\boldsymbol{\Sigma}$ , where  $\mathbf{O}$  is an orthogonal matrix with  $\mathbf{O}^T\mathbf{O} = \mathbf{OO}^T = \mathbf{I}_3$  and  $\mathbf{D}$  is a diagonal matrix with the diagonal entries  $d_1, d_2$  and  $d_3$ . Now let  $\mathbf{Y} = (Y_1, Y_2, Y_3)^T = \mathbf{O}^T\bar{\mathbf{X}}$ , then  $\mathbf{Y}$  is normal with mean  $\boldsymbol{\mu}_y = (\mu_{y1}, \mu_{y2}, \mu_{y3})^T = \mathbf{O}^T\boldsymbol{\mu}$  and covariance matrix  $\mathbf{D}/n$ . It is easy to show that

$$\text{var}(\|\bar{\mathbf{X}}\|^2) = \text{var}(\|\mathbf{Y}\|^2) = \sum_{k=1}^3 \text{var}(Y_k^2) = \sum_{k=1}^3 (6\mu_{yk}^2 d_k/n + 3d_k^2/n^2).$$

Hence

$$\begin{aligned} \text{var}(\|\bar{\mathbf{X}}\|^2) &= \sum_{k=1}^3 (6\mu_{yk}^2 d_k/n + 3d_k^2/n^2) \\ &= \frac{6}{n} \boldsymbol{\mu}_y^T \mathbf{D} \boldsymbol{\mu}_y + \frac{3}{n^2} \text{tr}(\boldsymbol{\Sigma}^2) \\ &= \frac{6}{n} \boldsymbol{\mu}^T \mathbf{O} \mathbf{D} \mathbf{O}^T \boldsymbol{\mu} + \frac{3}{n^2} \text{tr}(\boldsymbol{\Sigma}^2) \\ &= \frac{6}{n} \boldsymbol{\mu}^T \boldsymbol{\Sigma} \boldsymbol{\mu} + \frac{3}{n^2} \text{tr}(\boldsymbol{\Sigma}^2). \end{aligned}$$

By the central limit theorem,  $\frac{\|\bar{\mathbf{X}}\|^2 - \|\boldsymbol{\mu}\|^2 - \text{tr}(\boldsymbol{\Sigma})/n}{\sqrt{\text{var}(\|\bar{\mathbf{X}}\|^2)}}$  is approximately normal. Then an  $\alpha$ -level rejection region for testing  $\|\boldsymbol{\mu}\| = 1$  is given by

$$\left| \|\bar{\mathbf{X}}\|^2 - 1 \right| > z_{\alpha/2} \sqrt{\frac{6}{n} \boldsymbol{\mu}^T \boldsymbol{\Sigma} \boldsymbol{\mu}}$$

Note that we dropped the term  $\text{tr}(\boldsymbol{\Sigma})/n$  in the numerator and the term  $3\text{tr}(\boldsymbol{\Sigma}^2)/n^2$  in the denominator as they are of smaller order than  $\|\boldsymbol{\mu}\|^2$  and  $6\boldsymbol{\mu}^T \boldsymbol{\Sigma} \boldsymbol{\mu}/n$ , respectively. The term  $\boldsymbol{\mu}^T \boldsymbol{\Sigma} \boldsymbol{\mu}$  is unknown and needs to be estimated. Since under the null hypothesis that  $\|\boldsymbol{\mu}\| = 1$  we can derive  $\boldsymbol{\mu}^T \boldsymbol{\Sigma} \boldsymbol{\mu} \leq \|\boldsymbol{\Sigma}\|_{op}$ , where  $\|\cdot\|_{op}$  is the operator norm of a matrix, we use instead a conservative rejection region

$$\left| \|\bar{\mathbf{X}}\|^2 - 1 \right| > z_{\alpha/2} \sqrt{\frac{6}{n} \|\hat{\boldsymbol{\Sigma}}\|_{op}},$$

Table Web-1: Testing statistic  $T$  for the 20 subjects

| Subject | $T$    |
|---------|--------|
| 1       | 209.38 |
| 2       | 76.11  |
| 3       | 473.84 |
| 4       | 103.94 |
| 5       | 71.17  |
| 6       | 209.28 |
| 7       | 183.57 |
| 8       | 84.22  |
| 9       | 134.98 |
| 10      | 365.15 |
| 11      | 228.35 |
| 12      | 0.65   |
| 13      | 1.93   |
| 14      | 22.47  |
| 15      | 9.59   |
| 16      | 191.47 |
| 17      | 83.44  |
| 18      | 11.68  |
| 19      | 11.91  |
| 20      | 165.02 |

where  $\hat{\Sigma}$  is the sample covariance matrix from the sample  $\{\mathbf{X}_1, \dots, \mathbf{X}_n\}$ . We use  $\alpha = 0.05$  so that  $z_{\alpha/2} = 1.96$ . We display the value of the term

$$T = \frac{|\|\bar{\mathbf{X}}\|^2 - 1|}{\sqrt{\frac{6}{n}\|\hat{\Sigma}\|_{op}}}$$

for all subjects in Table Web-1. The results show that except for subjects 12 and 13, the null hypothesis of  $\|\boldsymbol{\mu}\|$  is always rejected.

## C Derivation of Rotation Matrices

Let  $\mathbf{a}_1$  and  $\mathbf{a}_2$  be two vectors in  $\mathbb{R}^3$  and  $\mathbf{a}_1 \times \mathbf{a}_2 \neq 0$ . Let

$$\mathbf{b}_2 = \frac{\mathbf{a}_2}{\|\mathbf{a}_2\|_2},$$

$$\mathbf{b}_1 = \frac{\mathbf{a}_1 - (\mathbf{a}_1^T \mathbf{b}_2)\mathbf{b}_2}{\|\mathbf{a}_1 - (\mathbf{a}_1^T \mathbf{b}_2)\mathbf{b}_2\|_2}.$$

Then  $\mathbf{b}_1$  and  $\mathbf{b}_2$  are two unit vectors and are orthogonal to each other. We write  $\mathbf{a}_1$  and  $\mathbf{a}_2$  as

$$\begin{aligned}\mathbf{a}_2 &= c_2 \mathbf{b}_2, \\ \mathbf{a}_1 &= c_1 \mathbf{b}_1 + c_3 \mathbf{b}_2.\end{aligned}$$

Then  $c_1 > 0, c_2 > 0$  and  $c_3 > 0$ .

**Lemma 1.** *Let*

$$\mathbf{R}^* = \arg \min_{\mathbf{R}^T = \mathbf{R}^{-1} \text{ and } \mathbf{e}_3^T \mathbf{R}(\mathbf{a}_1 \times \mathbf{a}_2) > 0} (\|\mathbf{R}\mathbf{a}_1 + \mathbf{e}_1\|_2^2 + \|\mathbf{R}\mathbf{a}_2 + \mathbf{e}_2\|_2^2).$$

*Then  $\mathbf{R}^*$  is unique with the expression*

$$\begin{pmatrix} \cos(\theta) & -\sin(\theta) & 0 \\ \sin(\theta) & \cos(\theta) & 0 \\ 0 & 0 & 1 \end{pmatrix}^T [\mathbf{b}_1, \mathbf{b}_2, \mathbf{b}_1 \times \mathbf{b}_2]^T,$$

where

$$\begin{aligned}\cos(\theta) &= -\frac{c_1 + c_3}{\sqrt{(c_1 + c_2)^2 + c_3^2}}, \\ \sin(\theta) &= -\frac{c_2}{\sqrt{(c_1 + c_2)^2 + c_3^2}}.\end{aligned}$$

*Proof.* For an arbitrary rotation matrix  $\mathbf{R}$ ,  $\mathbf{R}^T = \mathbf{R}^{-1}$  is also a rotation matrix. Hence  $\mathbf{R}^T \mathbf{e}_1$  and  $\mathbf{R}^T \mathbf{e}_2$  remain orthogonal unit vectors. For the minimization problem, there exists an  $\theta \in [0, \pi]$  such that

$$\begin{aligned}\mathbf{R}^T \mathbf{e}_1 &= \cos(\theta) \mathbf{b}_1 + \sin(\theta) \mathbf{b}_2, \\ \mathbf{R}^T \mathbf{e}_2 &= -\sin(\theta) \mathbf{b}_1 + \cos(\theta) \mathbf{b}_2.\end{aligned}\tag{A-1}$$

It follows that

$$\begin{aligned}&\|\mathbf{R}\mathbf{a}_1 + \mathbf{e}_1\|_2^2 + \|\mathbf{R}\mathbf{a}_2 + \mathbf{e}_2\|_2^2 \\ &= \|\mathbf{a}_1 + \mathbf{R}^T \mathbf{e}_1\|_2^2 + \|\mathbf{a}_2 + \mathbf{R}^T \mathbf{e}_2\|_2^2 \\ &= \|(c_1 + \cos(\theta)) \mathbf{b}_1 + (c_3 + \sin(\theta)) \mathbf{b}_2\|_2^2 + \|\sin(\theta) \mathbf{b}_1 + (c_2 + \cos(\theta)) \mathbf{b}_2\|_2^2 \\ &= (c_1 + \cos(\theta))^2 + (c_3 + \sin(\theta))^2 + \sin(\theta)^2 + (c_2 + \cos(\theta))^2 \\ &= 2 + c_1^2 + c_2^2 + c_3^2 + 2(c_1 + c_2) \cos(\theta) + 2c_3 \sin(\theta).\end{aligned}$$

Therefore,  $\|\mathbf{R}\mathbf{a}_1 + \mathbf{e}_1\|_2^2 + \|\mathbf{R}\mathbf{a}_2 + \mathbf{e}_2\|_2^2$  is minimized if  $\cos(\theta) = -(c_1 + c_2)/\sqrt{(c_1 + c_2)^2 + c_3^2}$  and  $\sin(\theta) = -c_3/\sqrt{(c_1 + c_2)^2 + c_3^2}$ . By (A-1),

$$\begin{aligned}\mathbf{R}^T \mathbf{e}_3 &= \mathbf{R}^T (\mathbf{e}_1 \times \mathbf{e}_2) \\ &= (\mathbf{R}^T \mathbf{e}_1) \times (\mathbf{R}^T \mathbf{e}_2) \\ &= \mathbf{b}_1 \times \mathbf{b}_2.\end{aligned}$$

Then

$$\mathbf{R}^T[\mathbf{e}_1, \mathbf{e}_2, \mathbf{e}_3] = [\mathbf{b}_1, \mathbf{b}_2, \mathbf{b}_1 \times \mathbf{b}_2] \begin{pmatrix} \cos(\theta) & -\sin(\theta) & 0 \\ \sin(\theta) & \cos(\theta) & 0 \\ 0 & 0 & 1 \end{pmatrix}.$$

It's easy to verify that  $\mathbf{R}^{-1} = \mathbf{R}^T$  and the proof is complete.  $\square$

## D An Alternative Approach for Normalizing Accelerometry Data

We propose a method for jointly estimating the rotation matrix  $\mathbf{R}$  and the bias vector  $\mathbf{b}$  for standing. We minimize the following objective function

$$\min_{\mathbf{R}^T=\mathbf{R}^{-1}, \mathbf{b}} \|\mathbf{R}\mathbf{a}_1 + \mathbf{e}_1 - \mathbf{b}\|_2^2 + \|\mathbf{R}\mathbf{a}_2 + \mathbf{e}_2\|_2^2.$$

It can be shown easily that the minimizers to the above are  $\hat{\mathbf{b}} = \hat{\mathbf{R}}\mathbf{a}_1 + \mathbf{e}_1$  and

$$\hat{\mathbf{R}} = \arg \min_{\mathbf{R}^T=\mathbf{R}^{-1}} \|\mathbf{R}\mathbf{a}_2 + \mathbf{e}_2\|_2^2.$$

However,  $\hat{\mathbf{R}}$  is not unique and satisfies  $\hat{\mathbf{R}}^T = \hat{\mathbf{R}}^{-1}$  and  $\hat{\mathbf{R}}^T \mathbf{e}_2 = -\mathbf{b}_2$ . Here we are using the notation at the beginning of last section. The idea is that we expect the bias  $\mathbf{b}$  to be small and hence we select the final estimate of rotation matrix by

$$\mathbf{R}^* = \arg \min_{\hat{\mathbf{R}}^T=\hat{\mathbf{R}}^{-1}, \hat{\mathbf{R}}^T \mathbf{e}_2=-\mathbf{b}_2} \|\mathbf{R}\mathbf{a}_1 + \mathbf{e}_1\|_2^2.$$

It can be shown that  $\mathbf{R}^{*,T} \mathbf{e}_1 = -\mathbf{b}_1$ . Therefore with the conditions

$$\mathbf{R}^{*,T} \mathbf{e}_1 = -\mathbf{b}_1, \mathbf{R}^{*,T} \mathbf{e}_2 = -\mathbf{b}_2$$

and that  $\mathbf{e}_3^T \mathbf{R}^*(\mathbf{a}_1 \times \mathbf{a}_2) > 0$ , we obtain

$$\mathbf{R}^* = [-\mathbf{b}_1, -\mathbf{b}_2, \mathbf{b}_1 \times \mathbf{b}_2]^T.$$

The results from the method proposed in the paper and the above alternative method can be compared. It is easy to see that if  $c_3$  is zero, i.e.,  $\mathbf{a}_1$  and  $\mathbf{a}_2$  are orthogonal, expected if no bias in the measurement, then  $\cos(\theta) = -1$  and we get the same results. If  $c_3$  is far from zero, then we will get different results. For the data example, we found  $c_3$  small for all subjects and hence both methods give very similar results.
